# Supplementary material for: Five‐Year Risk of Acute Myocardial Infarction After Acute Ischemic Stroke in Korea
Source: PubMed Central journal article supplement — J Am Heart Assoc. 2020 Dec 29;10(1):e018807. doi: 10.1161/JAHA.120.018807 (PMC7955456; doi:10.1161/jaha.120.018807), 2020-12-29
Supplement: JAH3-10-e018807-s001.pdf [file JAH3-10-e018807-s001.pdf]

# **SUPPLEMENTAL MATERIAL**

## **CRCS-K Investigators:**

Beom Joon Kim, MD, PhD (Seoul National University Bundang Hospital, site investigator); Hee-Joon Bae, MD, PhD (Seoul National University Bundang Hospital, site investigator); Moon-Ku Han, MD, PhD (Seoul National University Bundang Hospital; site investigator); Jihoon Kang, MD (Seoul National University Bundang Hospital; site investigator); Jun Yup Kim, MD (Seoul National University Bundang Hospital; site investigator); Joon-Tae Kim, MD, PhD (Chonnam National University Hospital, site investigator); Ki-Hyun Cho, MD, PhD (Chonnam National University Hospital, site investigator); Man-Seok Park, MD, PhD (Chonnam National University Hospital, site investigator); Kang-Ho Choi, MD (Chonnam National University Hospital, site investigator); Dong-Ick Shin, MD, PhD (Chungbuk National University Hospital, site investigator); Jae-Kwan Cha, MD, PhD (Dong-A University Hospital, site investigator); Dae-Hyun Kim, MD, PhD (Dong-A University Hospital, site investigator); Dong-Eog Kim, MD, PhD (Dongguk University Ilsan Hospital, site investigator); Wi-Sun Ryu, MD, PhD (Dongguk University Ilsan Hospital, site investigator); Jong-Moo Park, MD, PhD (Eulji General Hospital, site investigator); Kyusik Kang, MD, PhD (Eulji General Hospital, site investigator); Soo Joo Lee, MD, PhD (Eulji University Hospital, site investigator); Jae Guk Kim, MD (Eulji University Hospital, site investigator); Mi-Sun Oh, MD, PhD (Hallym University Sacred Heart Hospital, site investigator); Kyung-Ho Yu, MD, PhD (Hallym University Sacred Heart Hospital, site investigator); Byung-Chul Lee, MD, PhD (Hallym University Sacred Heart Hospital, site investigator); Keun-Sik Hong, MD, PhD (Inje University Ilsan Paik Hospital, site investigator); Yong-Jin Cho, MD, PhD (Inje University Ilsan Paik Hospital, site investigator); Jay Chol Choi, MD, PhD (Jeju National University

Hospital, site investigator); Sung-Il Sohn, MD, PhD (Keimyung University Dongsan Medical Center, site investigator); Jeong-Ho Hong, MD, PhD (Keimyung University Dongsan Medical Center, site investigator); Tai Hwan Park, MD, PhD (Seoul Medical Center, site investigator); Sang-Soon Park, MD (Seoul Medical Center, site investigator); Jee-Hyun Kwon, MD, PhD (Ulsan University Hospital, site investigator), Wook-Joo Kim, MD (Ulsan University Hospital, site investigator); Kyung Bok Lee, MD, PhD (Soon Chun Hyang University Hospital, site investigator); Jun Lee, MD, PhD (Yeungnam University Medical Center, site investigator); Ji Sung Lee, PhD (Asan Medical Center, statistical analysis), Juneyoung Lee, PhD (Korea University, statistical analysis and data management)

**Table S1. Cumulative incidences of AMI after ischemic stroke according to its subtypes.**

|               | Cumulative incidence, % (95% CI) |               |               |               |               |
|---------------|----------------------------------|---------------|---------------|---------------|---------------|
|               | 1-year                           | 2-year        | 3-year        | 4-year        | 5-year        |
| Fatal MI      | 0.2 (0.1-0.3)                    | 0.2 (0.1-0.3) | 0.3 (0.2-0.4) | 0.3 (0.2-0.4) | 0.3 (0.2-0.4) |
| N of patients | 23                               | 25            | 31            | 33            | 33            |
| Non-fatal MI  | 0.9 (0.7-1.1)                    | 1.1 (0.9-1.3) | 1.3 (1.1-1.5) | 1.5 (1.3-1.8) | 1.7 (1.5-2.0) |
| N of patients | 102                              | 126           | 152           | 174           | 183           |
| STEMI         | 0.4 (0.3-0.5)                    | 0.4 (0.3-0.6) | 0.5 (0.4-0.7) | 0.6 (0.5-0.7) | 0.6 (0.5-0.8) |
| N of patients | 41                               | 50            | 61            | 67            | 69            |
| NSTEMI        | 0.2 (0.1-0.3)                    | 0.3 (0.2-0.4) | 0.3 (0.2-0.5) | 0.4 (0.3-0.6) | 0.5 (0.4-0.6) |
| N of patients | 22                               | 30            | 39            | 47            | 50            |
| Unspecified   | 0.5 (0.4-0.7)                    | 0.6 (0.5-0.8) | 0.7 (0.6-0.9) | 0.8 (0.7-1.0) | 0.9 (0.7-1.1) |
| N of patients | 62                               | 71            | 83            | 93            | 97            |

CI, cumulative incidence; MI, myocardial infarction; STEMI, ST-elevation myocardial infarction; NSTEMI, non-ST-elevation myocardial infarction

**Table S2. Predictors of acute myocardial infarction and mortality up to 5-years after ischemic stroke (Cause-specific hazard model) .**

|                                 | Hazard ratio (95% CI)       |                  |
|---------------------------------|-----------------------------|------------------|
|                                 | Acute myocardial infarction | Mortality        |
| Age>70                          | 1.54 (1.15-2.06)            | 3.78 (3.47-4.11) |
| Male sex                        | 1.15 (0.84-1.57)            | 1.04 (0.97-1.12) |
| Hypertension                    | 1.50 (1.05-2.15)            | 1.06 (0.97-1.15) |
| Diabetes                        | 1.78 (1.36-2.35)            | 1.32 (1.23-1.42) |
| Previous stroke or TIA          | 1.37 (1.01-1.85)            | 1.23 (1.14-1.33) |
| Coronary heart disease          | 2.87 (2.07-3.97)            | 1.14 (1.03-1.26) |
| Current smoker                  | 1.08 (0.76-1.54)            | 1.02 (0.93-1.12) |
| Stroke subtype                  |                             |                  |
| Large artery atherosclerosis    | 2.12 (1.25-3.59)            | 1.89 (1.65-2.17) |
| Small vessel occlusion          | [Reference]                 | [Reference]      |
| Cardioembolism                  | 2.93 (1.61-5.32)            | 2.74 (2.36-3.17) |
| Other determined                | 1.99 (0.58-6.85)            | 2.95 (2.24-3.88) |
| Undetermined                    | 2.77 (1.60-4.78)            | 2.34 (2.03-2.70) |
| Antiplatelet use at discharge   | 1.05 (0.71-1.53)            | 0.73 (0.67-0.79) |
| Statin use at discharge         | 1.03 (0.71-1.50)            | 0.59 (0.54-0.64) |
| LDL-C $\geq$ 100mg/dL           | 1.20 (0.89-1.61)            | 0.99 (0.92-1.07) |
| HDL-C<40mg/dL                   | 1.21 (0.93-1.58)            | 0.96 (0.90-1.04) |
| SBP $\geq$ 140mmHg              | 0.81 (0.62-1.07)            | 1.04 (0.97-1.11) |
| GFR<60mL/min/1.73m <sup>2</sup> | 1.39 (0.98-1.97)            | 1.95 (1.79-2.12) |

CI, confidence interval; TIA, transient ischemic attack; SBP, systolic blood pressure; LDL, low-density

lipoprotein; HDL, high-density lipoprotein; GFR, glomerular filtration rate

**Table S3. Predictors of acute myocardial infarction and mortality up to 5-years after ischemic stroke (symptomatic carotid artery disease and atrial fibrillation added to the model instead of stroke subtype).**

|                                     | Hazard ratio (95% CI)        |                             |                  |
|-------------------------------------|------------------------------|-----------------------------|------------------|
|                                     | Acute myocardial infarction  |                             | Mortality        |
|                                     | Subdistribution hazard model | Cause-specific hazard model |                  |
| Age>70                              | 1.33 (0.99-1.78)             | 1.53 (1.14-2.05)            | 3.65 (3.35-3.97) |
| Male sex                            | 1.15 (0.84-1.57)             | 1.13 (0.83-1.55)            | 1.01 (0.94-1.09) |
| Hypertension                        | 1.47 (1.03-2.10)             | 1.48 (1.04-2.11)            | 1.04 (0.96-1.13) |
| Diabetes                            | 1.69 (1.28-2.22)             | 1.74 (1.32-2.29)            | 1.29 (1.20-1.38) |
| Previous stroke or TIA              | 1.34 (0.99-1.81)             | 1.36 (1.00-1.84)            | 1.22 (1.13-1.32) |
| Atrial fibrillation                 | 1.36 (0.93-2.00)             | 1.49 (1.00-2.23)            | 1.47 (1.34-1.61) |
| Coronary heart disease              | 2.88 (2.08-4.00)             | 2.92 (2.10-4.04)            | 1.16 (1.04-1.28) |
| Current smoker                      | 1.06 (0.74-1.51)             | 1.07 (0.75-1.53)            | 1.01 (0.92-1.11) |
| Symptomatic carotid artery stenosis | 1.35 (0.94-1.94)             | 1.50 (1.04-2.15)            | 1.69 (1.55-1.85) |
| Antiplatelet use at discharge       | 1.12 (0.75-1.67)             | 1.02 (0.67-1.54)            | 0.69 (0.63-0.75) |
| Statin use at discharge             | 1.20 (0.82-1.75)             | 1.03 (0.71-1.50)            | 0.58 (0.54-0.63) |
| LDL-C $\geq$ 100mg/dL               | 1.18 (0.88-1.57)             | 1.20 (0.89-1.61)            | 0.98 (0.92-1.06) |
| HDL-C<40mg/dL                       | 1.23 (0.94-1.61)             | 1.21 (0.92-1.58)            | 0.96 (0.89-1.03) |
| SBP $\geq$ 140mmHg                  | 0.79 (0.60-1.04)             | 0.79 (0.61-1.04)            | 1.02 (0.95-1.09) |
| GFR<60mL/min/1.73m <sup>2</sup>     | 1.21 (0.85-1.71)             | 1.39 (0.98-1.97)            | 1.94 (1.78-2.11) |

CI, confidence interval; TIA, transient ischemic attack; SBP, systolic blood pressure; LDL, low-density

lipoprotein; HDL, high-density lipoprotein; GFR, glomerular filtration rate

**Table S4. Predictors of acute myocardial infarction and mortality up to 5-years after ischemic stroke (age, systolic blood pressure, low-density lipoprotein, high-density lipoprotein, glomerular filtration rate as continuous variables).**

|                                  | Hazard ratio (95% CI)        |                             |                     |
|----------------------------------|------------------------------|-----------------------------|---------------------|
|                                  | Acute myocardial infarction  |                             | Mortality           |
|                                  | Subdistribution hazard model | Cause-specific hazard model |                     |
| Age (by 10 years-old)            | 1.19 (1.04-1.36)             | 1.31 (1.13-1.51)            | 2.18 (2.09-2.27)    |
| Male sex                         | 1.16 (0.84-1.62)             | 1.15 (0.83-1.61)            | 1.13 (1.04-1.22)    |
| Hypertension                     | 1.43 (1.00-2.03)             | 1.42 (1.00-2.01)            | 1.00 (0.93-1.09)    |
| Diabetes                         | 1.70 (1.29-2.25)             | 1.76 (1.34-2.33)            | 1.39 (1.30-1.50)    |
| Previous stroke or TIA           | 1.34 (0.99-1.81)             | 1.36 (1.01-1.83)            | 1.26 (1.17-1.36)    |
| Coronary heart disease           | 2.88 (2.09-3.96)             | 2.90 (2.11-3.99)            | 1.15 (1.04-1.27)    |
| Current smoker                   | 1.11 (0.78-1.58)             | 1.13 (0.79-1.61)            | 1.15 (1.05-1.27)    |
| Stroke subtype                   |                              |                             |                     |
| Large artery atherosclerosis     | 1.99 (1.17-3.38)             | 2.08 (1.23-3.53)            | 1.85 (1.62-2.12)    |
| Small vessel occlusion           | [Reference]                  | [Reference]                 | [Reference]         |
| Cardioembolism                   | 2.58 (1.42-4.66)             | 2.91 (1.61-5.29)            | 2.61 (2.26-3.02)    |
| Other determined                 | 1.96 (0.57-6.76)             | 2.33 (0.67-8.08)            | 4.19 (3.18-5.52)    |
| Undetermined                     | 2.51 (1.44-4.37)             | 2.74 (1.58-4.74)            | 2.27 (1.97-2.62)    |
| Antiplatelet use at discharge    | 1.16 (0.80-1.69)             | 1.05 (0.72-1.55)            | 0.73 (0.67-0.79)    |
| Statin use at discharge          | 1.17 (0.80-1.71)             | 1.00 (0.69-1.46)            | 0.59 (0.55-0.64)    |
| LDL-C (mmol/L)                   | 1.17 (1.00-1.36)             | 1.17 (1.01-1.37)            | 1.01 (0.97-1.05)    |
| HDL-C (mmol/L)                   | 0.64 (0.40-1.03)             | 0.63 (0.39-1.02)            | 0.94 (0.84-1.05)    |
| SBP (by 10mmHg)                  | 0.98 (0.93-1.03)             | 0.98 (0.93-1.03)            | 1.00 (0.98-1.01)    |
| GFR (mL/min/1.73m <sup>2</sup> ) | 0.998 (0.994-1.002)          | 0.997 (0.992-1.001)         | 0.996 (0.995-0.997) |

CI, confidence interval; TIA, transient ischemic attack; SBP, systolic blood pressure; LDL, low-density lipoprotein; HDL, high-density lipoprotein; GFR, glomerular filtration rate

**Table S5. Predictors of acute myocardial infarction and mortality up to 5-years after ischemic stroke (age, systolic blood pressure, low-density lipoprotein, high-density lipoprotein, glomerular filtration rate as continuous variables and symptomatic carotid artery disease and atrial fibrillation added to the model instead of stroke subtype).**

|                                     | Hazard ratio (95% CI)        |                             |                     |
|-------------------------------------|------------------------------|-----------------------------|---------------------|
|                                     | Acute myocardial infarction  |                             | Mortality           |
|                                     | Subdistribution hazard model | Cause-specific hazard model |                     |
| Age (by 10 years-old)               | 1.19 (1.04-1.36)             | 1.29 (1.12-1.50)            | 2.15 (2.06-2.24)    |
| Male sex                            | 1.16 (0.83-1.61)             | 1.14 (0.81-1.59)            | 1.09 (1.01-1.18)    |
| Hypertension                        | 1.41 (1.00-2.01)             | 1.41 (0.99-1.99)            | 0.99 (0.91-1.08)    |
| Diabetes                            | 1.67 (1.26-2.21)             | 1.72 (1.30-2.28)            | 1.37 (1.27-1.47)    |
| Previous stroke or TIA              | 1.34 (1.00-1.81)             | 1.35 (1.00-1.83)            | 1.26 (1.16-1.36)    |
| Atrial fibrillation                 | 1.34 (0.92-1.96)             | 1.47 (0.99-2.18)            | 1.39 (1.27-1.52)    |
| Coronary heart disease              | 2.93 (2.12-4.04)             | 2.95 (2.14-4.07)            | 1.16 (1.05-1.29)    |
| Current smoker                      | 1.08 (0.76-1.54)             | 1.11 (0.78-1.59)            | 1.14 (1.04-1.26)    |
| Symptomatic carotid artery stenosis | 1.32 (0.92-1.90)             | 1.45 (1.01-2.09)            | 1.63 (1.49-1.78)    |
| Antiplatelet use at discharge       | 1.12 (0.75-1.67)             | 1.01 (0.67-1.53)            | 0.68 (0.62-0.74)    |
| Statin use at discharge             | 1.17 (0.80-1.70)             | 1.00 (0.69-1.45)            | 0.59 (0.54-0.64)    |
| LDL-C (mmol/L)                      | 1.17 (1.00-1.36)             | 1.18 (1.01-1.37)            | 1.00 (0.97-1.05)    |
| HDL-C (mmol/L)                      | 0.64 (0.40-1.03)             | 0.63 (0.39-1.03)            | 0.95 (0.84-1.06)    |
| SBP (by 10mmHg)                     | 0.97 (0.92-1.02)             | 0.97 (0.92-1.02)            | 0.99 (0.98-1.00)    |
| GFR (mL/min/1.73m <sup>2</sup> )    | 0.998 (0.994-1.002)          | 0.997 (0.992-1.001)         | 0.996 (0.995-0.997) |

CI, confidence interval; TIA, transient ischemic attack; SBP, systolic blood pressure; LDL, low-density lipoprotein; HDL, high-density lipoprotein; GFR, glomerular filtration rate



Figure S1. Patient selection.

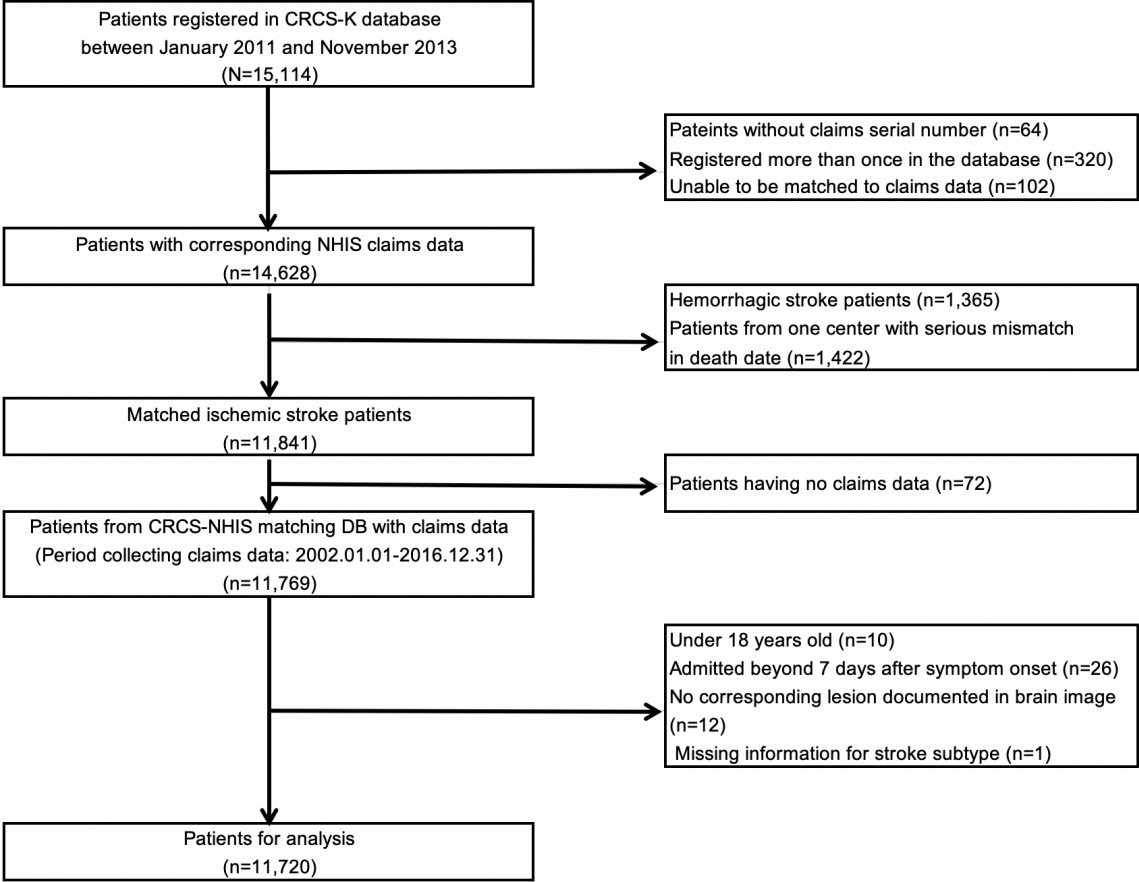

**Figure S2. Cumulative incidence of acute myocardial infarction after ischemic stroke for subgroups.**

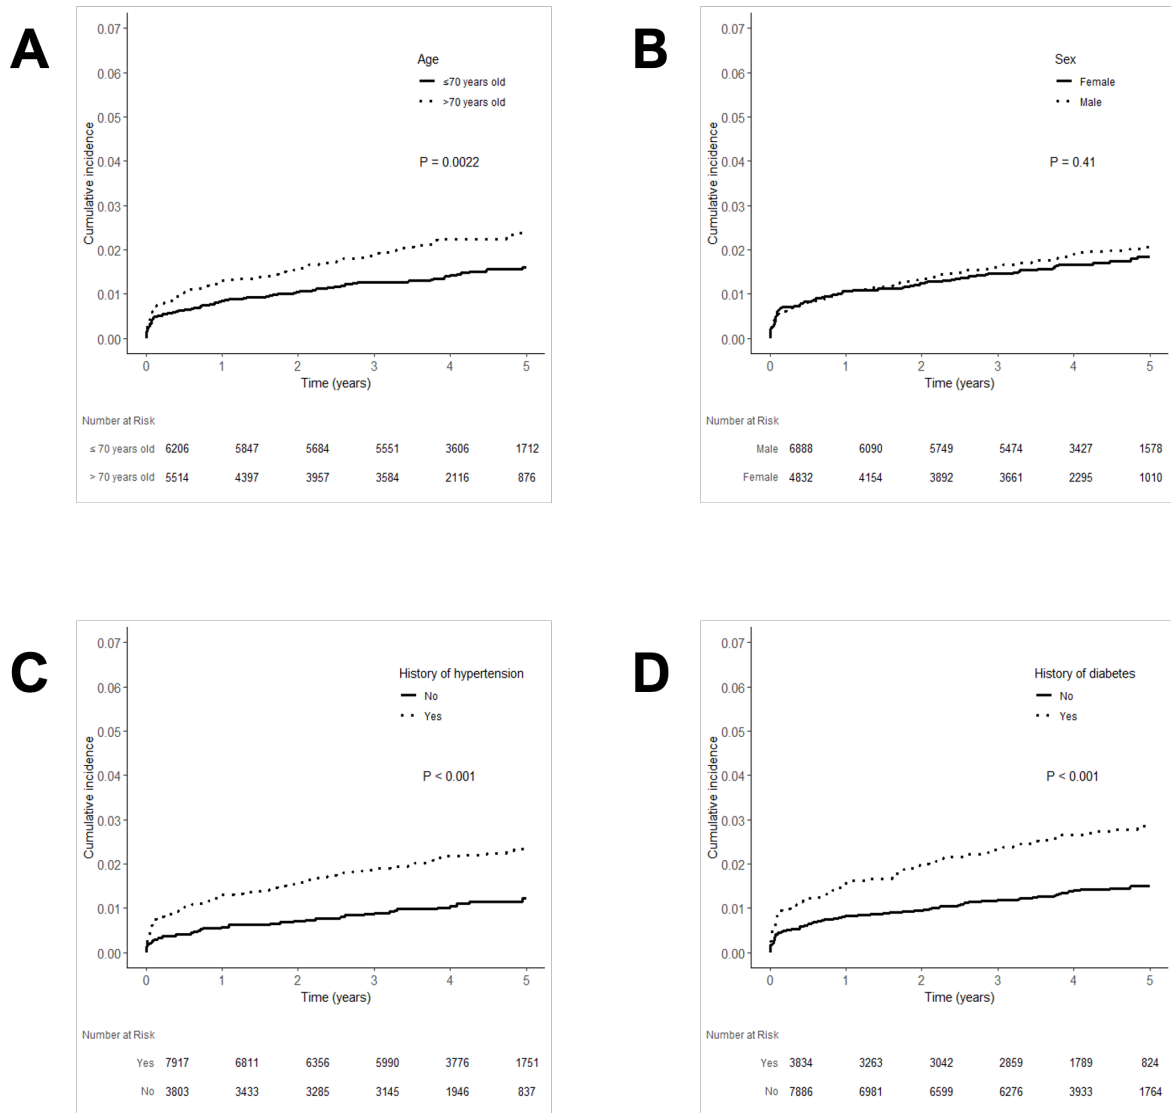

(A) Age (B) sex (C) history of hypertension (D) history of diabetes

**Figure S3. Cumulative incidence of acute myocardial infarction after ischemic stroke according to smoking status.**

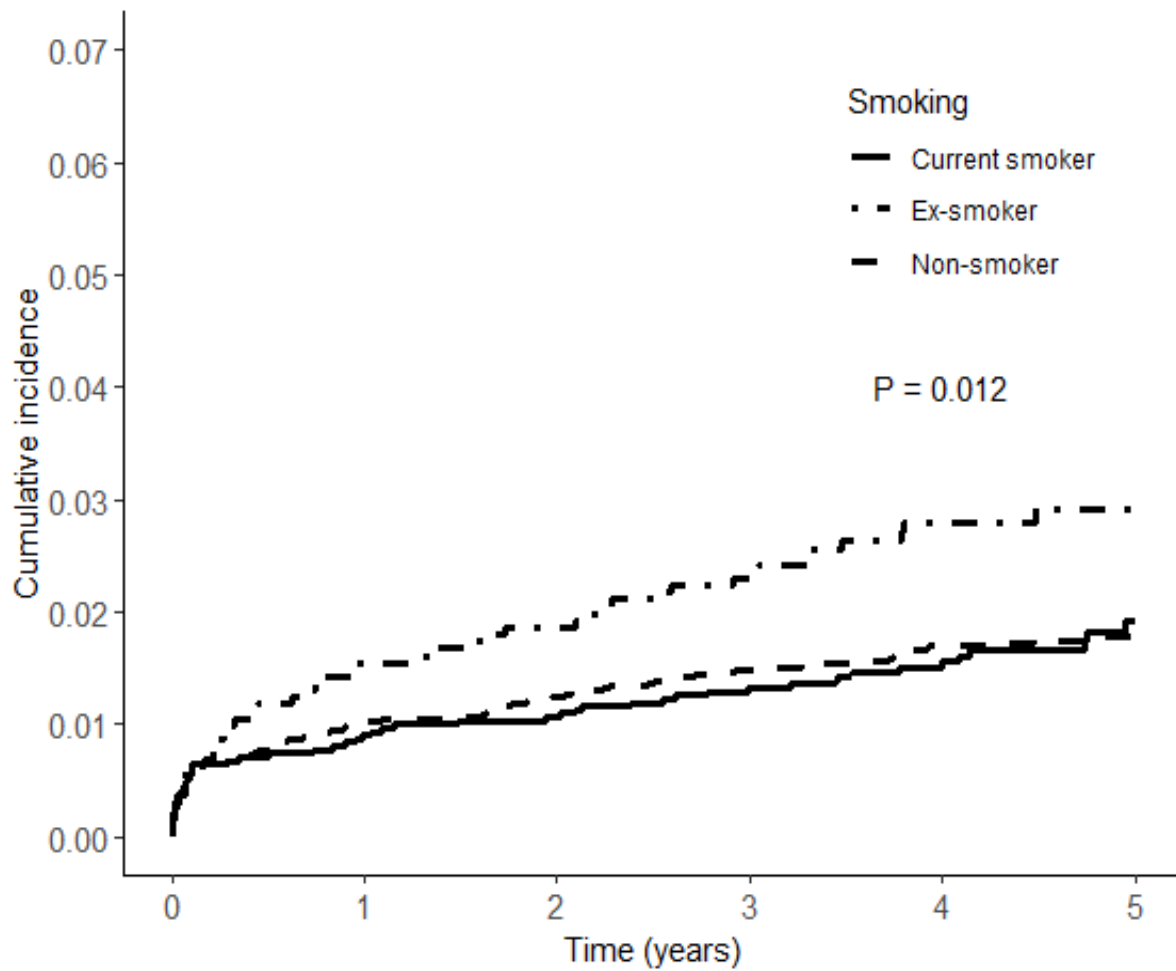

Number at Risk

|                |      |      |      |      |      |      |
|----------------|------|------|------|------|------|------|
| Current smoker | 3099 | 2844 | 2724 | 2626 | 1649 | 761  |
| Ex-smoker      | 1611 | 1387 | 1295 | 1229 | 765  | 353  |
| Non-smoker     | 7010 | 6013 | 5622 | 5280 | 3308 | 1474 |

Figure S4. Annual and monthly risk of acute myocardial infarction after acute ischemic stroke.

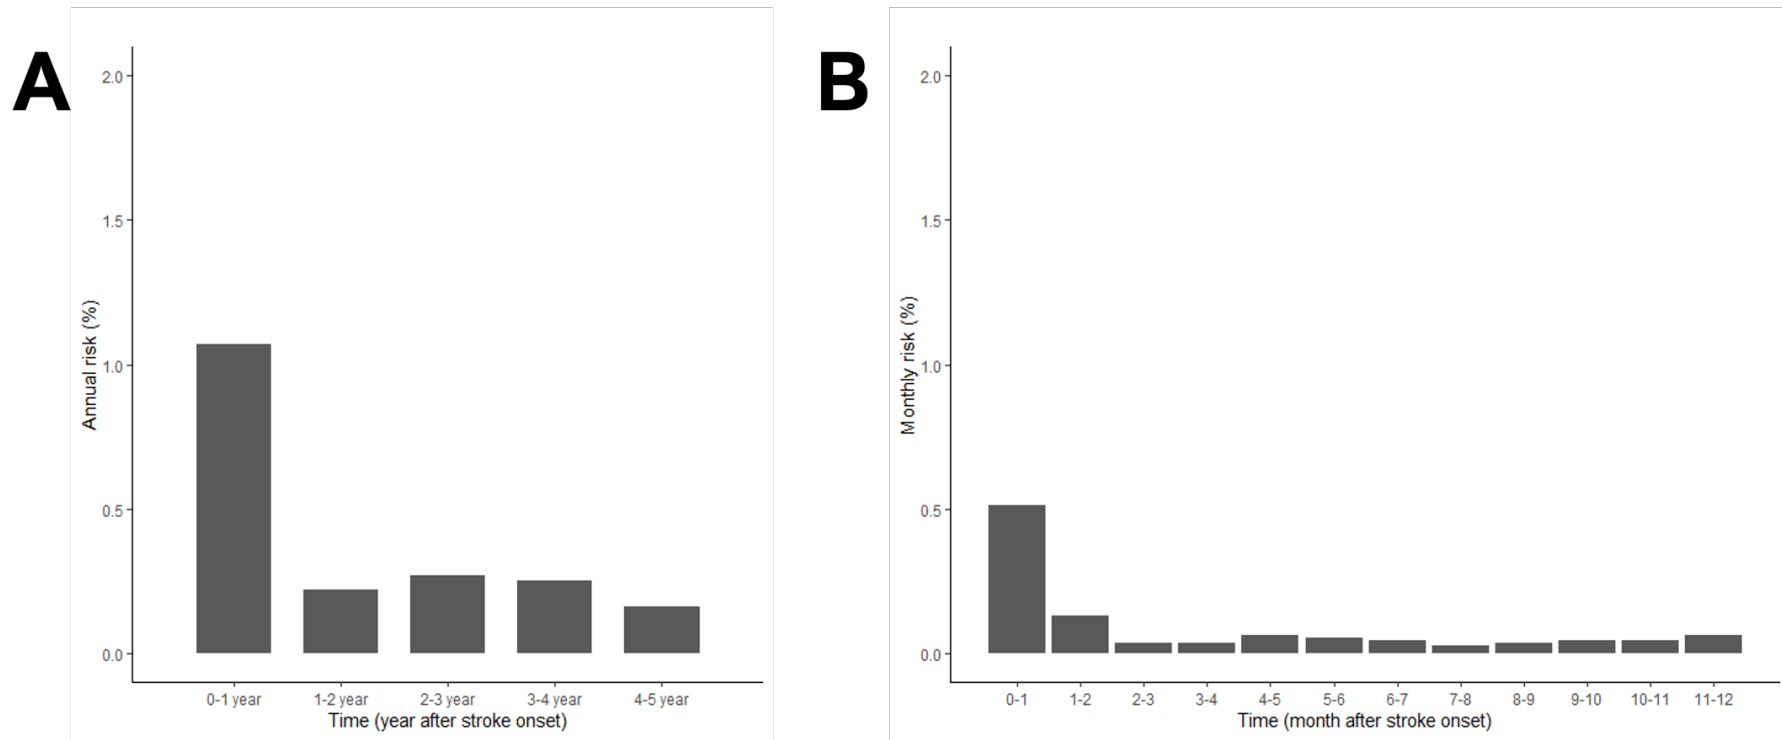

(A) Annual risk of acute myocardial infarction after acute ischemic stroke (B) monthly risk of acute myocardial infarction during the first year after acute ischemic stroke
